# Supplementary material for: Cryo-EM Structures of a Gonococcal Multidrug Efflux Pump Illuminate a Mechanism of Drug Recognition and Resistance
Source: PubMed Central journal article supplement (PMC7251214; doi:10.1128/mbio.00996-20), 2020-05-26
Supplement: mBio.00996-20-sf001.pdf [file mBio.00996-20-sf001.pdf]

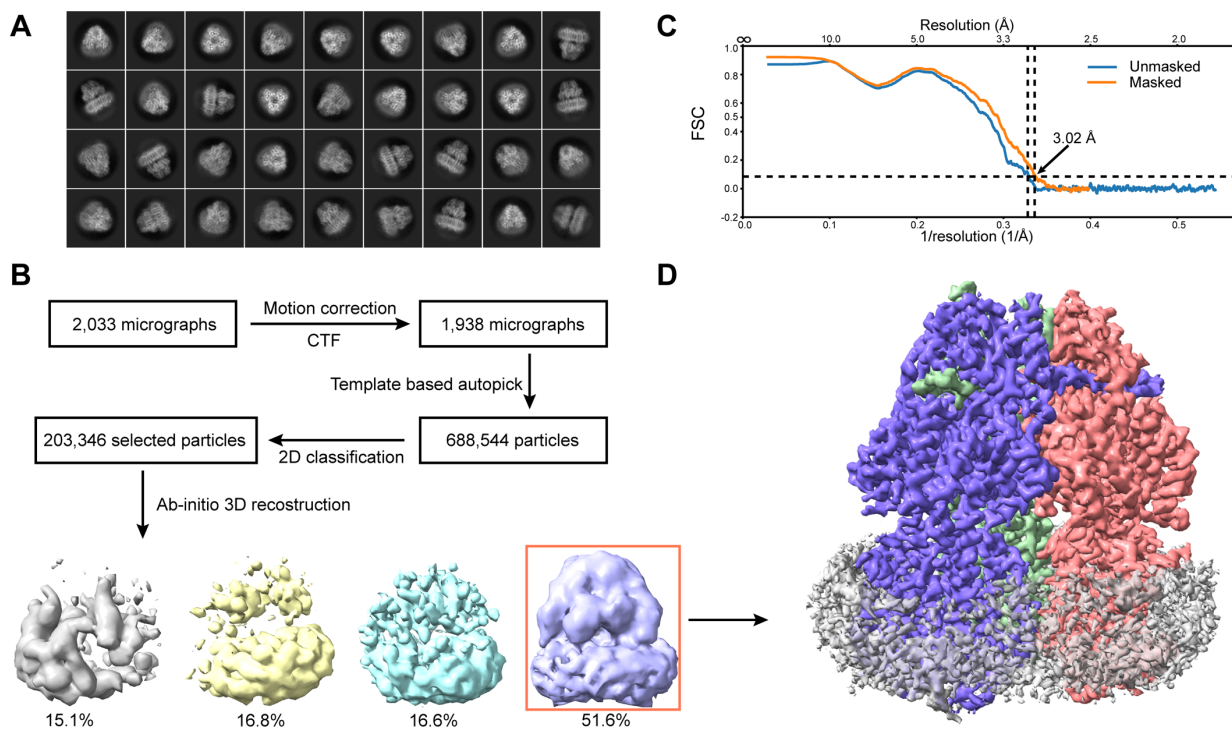

**Figure S1. Cryo-EM structure of the MtrD<sub>CR103</sub> efflux pump in complex with hydrolyzed, decarboxylated ampicillin.** (A) Representative 2D classes. (B) Data processing flowchart with particle distributions. A red box indicates the class used for further refinement. (C) Fourier shell correlation (FSC) curves showing resolution of 3.02 Å. (D) Density map of the hydrolyzed, decarboxylated ampicillin bound MtrD trimer. The “access”, “binding” and “extrusion” protomers are colored slate, dark pink and light green, respectively. Density contributed by the nanodisc is colored gray.
